# Supplementary material for: Acptp2,3 participates in the regulation of spore production, stress response, and pigments synthesis in Aspergillus cirstatus
Source: PeerJ. 2024 Sep 18;12:e17946. doi: 10.7717/peerj.17946 (PMC11416076; doi:10.7717/peerj.17946)
Supplement: Supplemental Information 1 [file peerj-12-17946-s001.xls]

## Sheet: Sheet1
ITEM TO CHECK	IMPORTANCE	CHECKLIST
EXPERIMENTAL DESIGN
Definition of experimental and control groups	E	experimental group: ΔAcptp2,3 and ΔAcptp2,3-C；control: WT
Number within each group	E	Number within experimental group：3：Number within controlgroup：3
Assay carried out by core lab or investigator's lab?	D	Assay carried out by investigator's lab
Acknowledgement of authors' contributions	D	Yes
SAMPLE
Description	E	The samples used for RNA extraction were Aspergillus cristatus wild type strain, ΔAcptp2,3 knockout strain and ΔAcptp2,3-C complementary strain
Volume/mass of sample processed	D	100mg
Microdissection or macrodissection	E	No
Processing procedure	E	No
If frozen - how and how quickly?	E	ice/ 15min
If fixed - with what, how quickly?	E
Sample storage conditions and duration (especially for FFPE samples)	E	Ultra low temperature refrigerator and 24h
NUCLEIC ACID EXTRACTION
Procedure and/or instrumentation	E	Follow the steps of the Tiangen Biochemical Total RNA Extraction Kit (DP419)
Name of kit and details of any modifications	E	Tiangen Biochemical Total RNA
Source of additional reagents used	D	Notihing
Details of DNase or RNAse treatment	E	DNaseI、RT411
Contamination assessment (DNA or RNA)	E	Noting
Nucleic acid quantification	E	25 ul
Instrument and method	E	Freezing centrifuge、UV spectrophotomete、CFX96 real-time fluorescence PCR instrument（Bio Rad ）
Purity (A260/A280)	D	1.92
Yield	D	No
RNA integrity method/instrument	E	UV spectrophotomete
RIN/RQI or Cq of 3' and 5' transcripts	E	28±2
Electrophoresis traces	D	The stripes are bright and clear without obvious trailing phenomenon
Inhibition testing (Cq dilutions, spike or other)	E	No
REVERSE TRANSCRIPTION
Complete reaction conditions	E	Reverse transcription mixture (A system) ：total RNA:1 ug; Oligo(dt) primer: 1ul；DEPC water；8ul；65℃：5min: ice：2min;Add to reverse transcription mixture (system A):5X RT Buffer:4ul；dNTP Mix:2ul; RNase inhibitor;1ul; Revert Aid MM-RTase：1ul;30℃：10min；42℃：60min; 70℃：5min；4℃：store.
Amount of RNA and reaction volume	E	Amount of RNA:1ug
Priming oligonucleotide (if using GSP) and concentration	E	Oligold(dt):1ul
Reverse transcriptase and concentration	E	SuperScript IV
Temperature and time	E	30℃：10min；42℃：60min; 70℃：5min；4℃：store.
Manufacturer of reagents and catalogue numbers	D	Fluorescence reagent (Bio-rad)
Cqs with and without RT	D*	no
Storage conditions of cDNA	D	﹣20℃
qPCR TARGET INFORMATION
If multiplex, efficiency and LOD of each assay.	E	no
Sequence accession number	E	JXNT01000005.1
Location of amplicon	D	CDS
Amplicon length	E	150bp
In silico specificity screen (BLAST, etc)	E	Yes
Pseudogenes, retropseudogenes or other homologs?	D	No
Sequence alignment	D	Yes
Secondary structure analysis of amplicon	D	No
Location of each primer by exon or intron (if applicable)	E	Not recorded
What splice variants are targeted?	E	Not recorded
qPCR OLIGONUCLEOTIDES
Primer sequences	E	RT-Acptp2,3-F:GAACCATTTGAAAGCCGAATATA;RT-Acptp2,3-R:AAAAAGAAAGAAAAAAGGAGGAASI65_05591-F:CACCAATATCTCATCGTCGCCTGTC;SI65_05591-R:CTTATCTGGGTTATCGGCACGGAAG;SI65_10255-F:ACATTGCCTGCTGCGATGCTAC;SI65_10225-R:TGACGAGACCACCCTCCTGTTG and so on.
RTPrimerDB Identification Number	D	No
Probe sequences	D**	No
Location and identity of any modifications	E	No
Manufacturer of oligonucleotides	D	Sangon Biotech
Purification method	D	Follow the instructions
qPCR PROTOCOL
Complete reaction conditions	E	2× real-time PCR mix 12.5 F 0.5 R 0.5 cDNA 1.0 ddH2O 10.5 Total 2595℃ 3 min 95℃ 10 s 64℃ 20 s 39× 72℃ 20 s + Plate Read Melt Curve 65℃ to 95℃，increment 0.5℃，for 0:05 + Plate Read
Reaction volume and amount of cDNA/DNA	E	1ul
Primer, (probe), Mg++ and dNTP concentrations	E	3mmmol/L
Polymerase identity and concentration	E	normal
Buffer/kit identity and manufacturer	E	No
Exact chemical constitution of the buffer	D	No
Additives (SYBR Green I, DMSO, etc.)	E	SYBR Green I
Manufacturer of plates/tubes and catalog number	D	Eight connecting tubes
Complete thermocycling parameters	E	94℃：3min; 94℃：10s; 60℃：30s; 72℃：10min;39X
Reaction setup (manual/robotic)	D	CFX96 real-time fluorescence PCR instrument（Bio Rad ）
Manufacturer of qPCR instrument	E	Bio Rad
qPCR VALIDATION
Evidence of optimisation (from gradients)	D	No
Specificity (gel, sequence, melt, or digest)	E	good
For SYBR Green I, Cq of the NTC	E	normal
Standard curves with slope and y-intercept	E	y=-2.29x+23.2
PCR efficiency calculated from slope	E	0.95
Confidence interval for PCR efficiency or standard error	D	No
r2 of standard curve	E	0.997
Linear dynamic range	E	10 logs
Cq variation at lower limit	E	25 copies
Confidence intervals throughout range	D	threshold=10'Sdcycle6-15
Evidence for limit of detection	E	Not recorded
If multiplex, efficiency and LOD of each assay.	E	No
DATA ANALYSIS
qPCR analysis program (source, version)	E	bio-rad
Cq method determination	E	Not recorded
Outlier identification and disposition	E	No
Results of NTCs	E	Normal
Justification of number and choice of reference genes	E	GAPDH
Description of normalisation method	E	Normalize data using Excel
Number and concordance of biological replicates	D	5 biological replicates with good reproducibility
Number and stage (RT or qPCR) of technical replicates	E	3
Repeatability (intra-assay variation)	E	good
Reproducibility (inter-assay variation, %CV)	D	good
Power analysis	D	No
Statistical methods for result significance	E	Using Excel for statistical analysis
Software (source, version)	E	Excel 2019
Cq or raw data submission using RDML	D	no
Table 1. MIQE checklist for authors, reviewers and editors. All essential information (E) must be submitted with the manuscript. Desirable
information (D) should be submitted if available. If using primers obtained from RTPrimerDB, information on qPCR target, oligonucleotides,
protocols and validation is available from that source.
*: Assessing the absence of DNA using a no RT assay is essential when first extracting RNA. Once the sample has been validated as
RDNA-free, inclusion of a no-RT control is desirable, but no longer essential.
**: Disclosure of the probe sequence is highly desirable and strongly encouraged. However, since not all commercial pre-designed assay
vendors provide this information, it cannot be an essential requirement. Use of such assays is advised against.
